# Supplementary material for: Barium Titanate Functionalization with Organosilanes: Effect on Particle Compatibility and Permittivity in Nanocomposites
Source: MDPI journal article supplement (doi:10.3390/molecules27196499), 2022-10-01
Supplement: s1 [file s1]

SUPPLEMENTARY MATERIAL

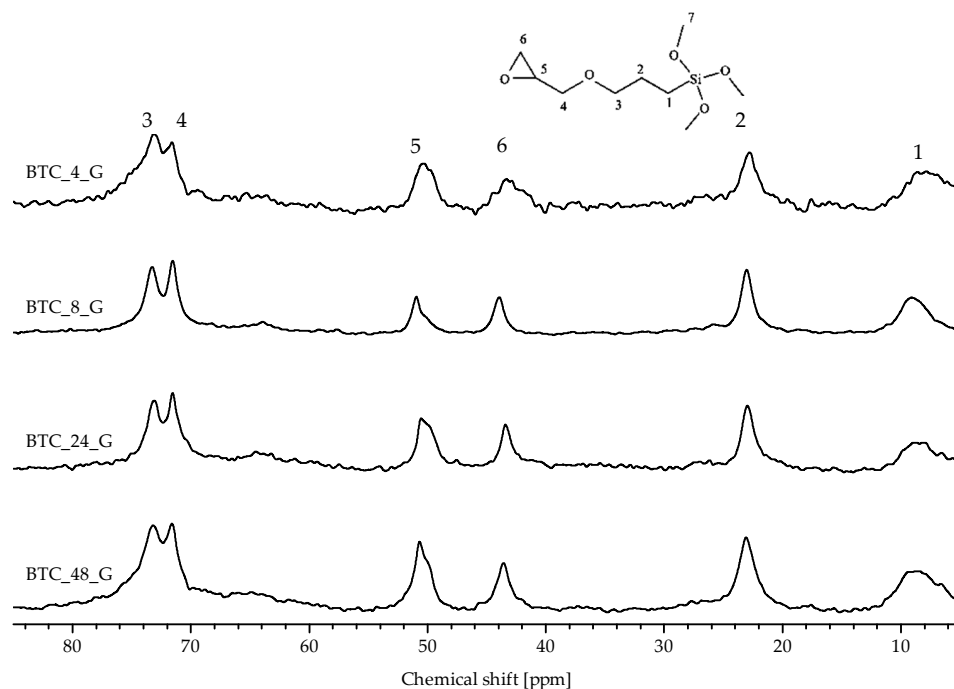

**Figure S1.**  $^{13}\text{C}$  CPMAS NMR spectra of G-functionalized BTC particles hydroxylated for different time

**Table S1.** Results from DSC analysis on cured polymer-ceramic nanocomposites

| Sample label    | $T_g$ [°C] (first heating) | $T_m$ [°C] | $\Delta H_m$ [J/g] | $T_{cc}$ [°C] | $\Delta H_{cc}$ [J/g] |
|-----------------|----------------------------|------------|--------------------|---------------|-----------------------|
| Epoxy           | 9                          | -          | -                  | -             | -                     |
| Epoxy_3.5_BTH   | 6                          | -          | -                  | -             | -                     |
| Epoxy_3.5_BTH_G | 8                          | -          | -                  | -             | -                     |
| Epoxy_21_BTH    | 8                          | -          | -                  | -             | -                     |
| Epoxy_21_BTH_G  | 26                         | -          | -                  | -             | -                     |
| PDMS            | -125                       | -41        | -28.24             | -81           | 27.49                 |
| PDMS_3.5_BTH    | -120                       | -37        | -23.66             | -84           | 24.14                 |
| PDMS_3.5_BTH_G  | -124                       | -42        | -23.52             | -79           | 24.21                 |
| PDMS_21_BTH     | -125                       | -42        | -11.12             | -82           | 10.73                 |
| PDMS_21_BTH_G   | -127                       | -43        | -13.67             | -79           | 13.75                 |

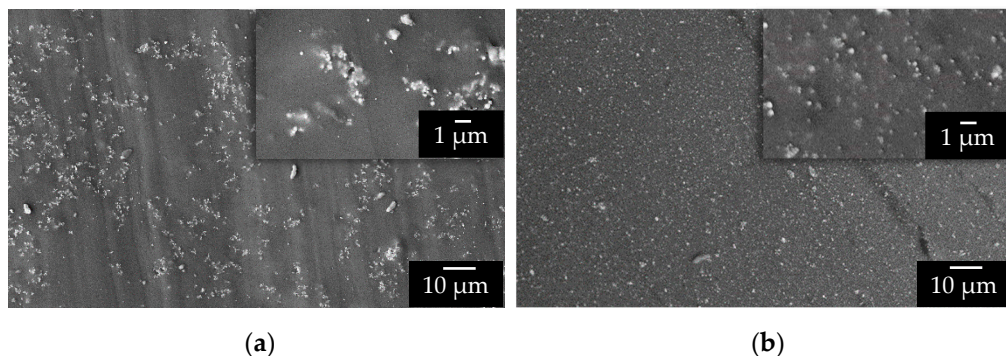

**Figure S2.** Cross section SEM images of epoxy composites with 3.5 vol% filler content. The particles employed are (a) BTH and (b) BTH\_G.

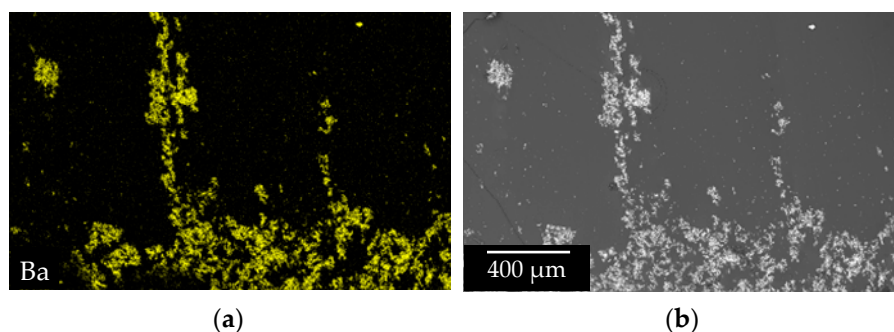

**Figure S3.** EDXS barium elemental map (a) and image of the reference area (b) of the PDMS composite at 3.5 vol% filler content loaded with bare BTH particles.

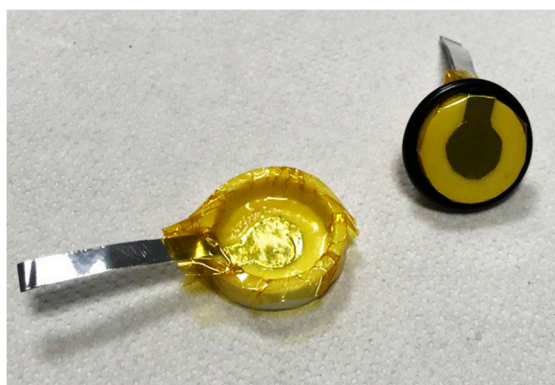

**Figure S4.** The modified mold used for poling during the cross-linking. Each part is equipped with an aluminum electrode and covered with a dielectric film. The positive mold has an O-ring tighten around to control the thickness of the final composite.

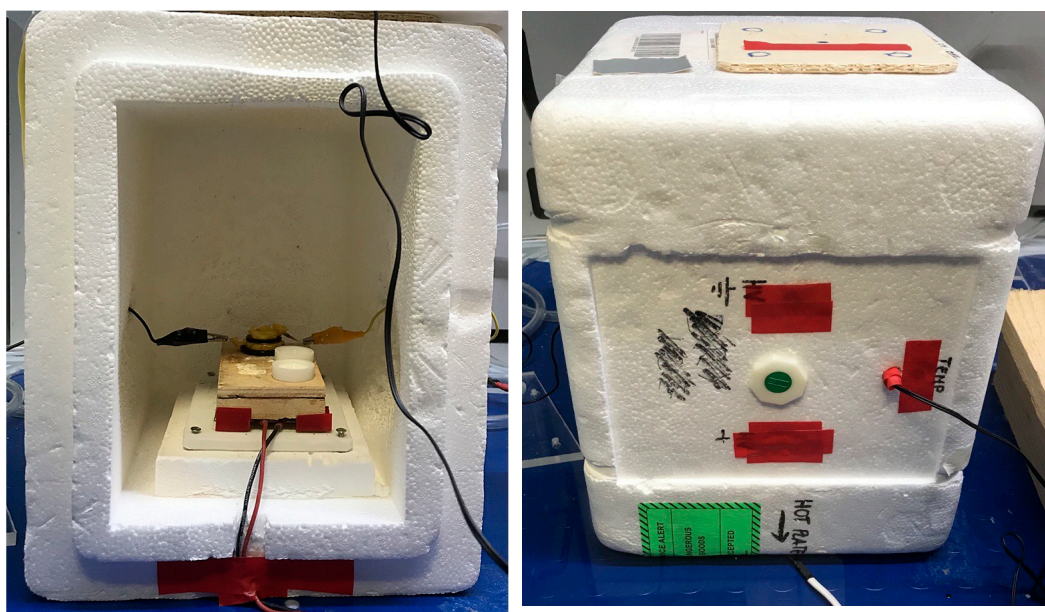

**Figure S5.** Experimental apparatus employed for combined poling/thermal curing of the nanocomposites; the filled molds are placed inside a polystyrene box equipped with the high voltage connectors and a heating plate controlled by a thermostat.
